# Supplementary material for: A glucose carbonate apatite complex exhibits in vitro and in vivo anti-tumour effects
Source: PubMed Central journal article supplement — Sci Rep. 2015 Jan 13;5:7742. doi: 10.1038/srep07742 (PMC4648380; doi:10.1038/srep07742), 2015-01-13
Supplement: srep07742-s1.pdf [file srep07742-s1.pdf]

## Supplementary Information

### **A glucose carbonate apatite complex exhibits *in vitro* and *in vivo* antitumour effects**

Hirofumi Yamamoto<sup>1\*</sup>, Xin Wu<sup>1, 2</sup>, Hiroyuki Nakanishi<sup>3</sup>, Yuki Yamamoto<sup>3</sup>, Mamoru Uemura<sup>1</sup>, Taishi Hata<sup>1</sup>, Junichi Nishimura<sup>1</sup>, Ichiro Takemasa<sup>1</sup>, Tsunekazu Mizushima<sup>1</sup>, Jun-Ichi Sasaki<sup>4</sup>, Satoshi Imazato<sup>4</sup>, Nariaki Matsuura<sup>5</sup>, Yuichiro Doki<sup>1</sup>, and Masaki Mori<sup>1</sup>

**Supplementary Figure S1.** *In vivo* tumour uptake of glucose facilitated by CA-[Glc].

CA-[Glc] complex containing 100 mg glucose and Glc (100mg) were i.v. injected in the mouse therapeutic model of pre-established head and neck FaDu tumours. The glucose in tumour treated with CA-[Glc] was significantly higher at 3 and 24 h than that treated with Glc (n = 4,  $P = 0.0265$  for both).

**Supplementary Table S1.** Test items and schedule of non-human primate toxicity study.

**Supplementary Table S2.** Items and methods of examination on cumulative urine samples.

**Supplementary Table S3.** Items and methods of examination on blood samples.

**Supplementary Figure S1**

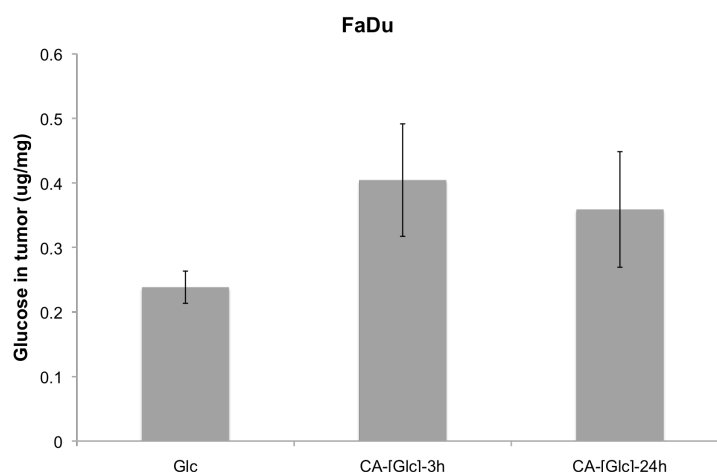

**Supplementary Table S1**

| Item                             | Schedule or frequency                                                          |                                                                 |
|----------------------------------|--------------------------------------------------------------------------------|-----------------------------------------------------------------|
| Observation of general condition | Week -1:                                                                       | Once a day (between 08:00 ~12:30)                               |
|                                  | Each administration day:                                                       | Before and 0, 30 min, 1, 2, 3, and 5 hours after administration |
|                                  | Recovery period:                                                               | Once a day (between 08:00 ~12:30)                               |
| Measurement of body weight       | Week -1:                                                                       | Once a day (between 08:00 ~12:30)                               |
|                                  | Each administration day:                                                       | Once a day (between 08:00 ~12:30)                               |
| Measurement of food consumption  | Every day in Week -1, and during the administration period and recovery period |                                                                 |
| Urinalysis                       | Day before administration :                                                    | Once a day (between 12:00 ~15:00)                               |
|                                  | Each administration day:                                                       | Once a day (0~3 hours after administration)                     |
| Blood chemistry examination      | Day before administration:                                                     | Once a day (between 08:00 ~12:30)                               |
|                                  | Each administration day:                                                       | Once a day (before administration)                              |

**Supplementary Table S2**

| Examination on cumulative urine sample                                                             |                                                                 |
|----------------------------------------------------------------------------------------------------|-----------------------------------------------------------------|
| <u>Item</u>                                                                                        | <u>Method of measurement</u>                                    |
| Urine volume                                                                                       | Volumetry using a measuring cylinder<br>(Unit: mL)              |
| Sodium }<br>Potassium }<br>Chloride }                                                              | Ion-selective electrode method <sup>a)</sup><br>(Unit: mmol/3h) |
| Instruments used<br>a): Clinical Laboratory System TBA-120FR (Toshiba Medical Systems Corporation) |                                                                 |

**Supplementary Table S3**

| <u>Item</u>                                                                                      | <u>Method</u>                                                      | <u>Unit</u> |
|--------------------------------------------------------------------------------------------------|--------------------------------------------------------------------|-------------|
| ALP                                                                                              | Bessey-Lowry method <sup>a)</sup>                                  | IU/L        |
| Total cholesterol (T-CHO)                                                                        | CEH-COD-POD method <sup>a)</sup>                                   | mg/dL       |
| Triglyceride (TG)                                                                                | LPL-GK-GPO-POD method <sup>a)</sup>                                | mg/dL       |
| Phospholipid (PL)                                                                                | PLD-ChOD-POD method <sup>a)</sup>                                  | mg/dL       |
| Total bilirubin (T-BIL)                                                                          | Bilirubin oxidase method <sup>a)</sup>                             | mg/dL       |
| Glucose (GLU)                                                                                    | Glucose dehydrogenase method <sup>a)</sup>                         | mg/dL       |
| Blood urea nitrogen (BUN)                                                                        | Urease-LEDH method <sup>a)</sup>                                   | mg/dL       |
| Creatinine (CRNN)                                                                                | Creatininase-creatinase-sarcosine oxidase-POD method <sup>a)</sup> | mg/dL       |
| Sodium (Na)                                                                                      | Ion selective electrode method <sup>a)</sup>                       | mmol/L      |
| Potassium (K)                                                                                    | Ion selective electrode method <sup>a)</sup>                       | mmol/L      |
| Chloride (Cl)                                                                                    | Ion selective electrode method <sup>a)</sup>                       | mmol/L      |
| Calcium (Ca)                                                                                     | OCPC method <sup>a)</sup>                                          | mg/dL       |
| Total protein (TP)                                                                               | Biuret method <sup>a)</sup>                                        | g/dL        |
| Albumin (ALB)                                                                                    | BCG method <sup>a)</sup>                                           | g/dL        |
| A/G ratio (A/G)                                                                                  | Calculated from total protein and albumin                          |             |
| AST                                                                                              | UV-rate method <sup>a)</sup>                                       | IU/L        |
| ALT                                                                                              | UV-rate method <sup>a)</sup>                                       | IU/L        |
| CPK                                                                                              | UV-rate method <sup>a)</sup>                                       | IU/L        |
| LDH                                                                                              | UV-rate method <sup>a)</sup>                                       | IU/L        |
| Equipment used<br>a): Clinical Laboratory System TBA-120FR (Toshiba Medical Systems Corporation) |                                                                    |             |
